1 **Laboratory contamination over time during low-biomass sample analysis**

2

3 **Authors:** Laura S. Weyrich<sup>1,2</sup>, Andrew G. Farrer<sup>1</sup>, Raphael Eisenhofer<sup>1,2</sup>, Luis A.

4 Arriola<sup>1</sup>, Jennifer Young<sup>1†</sup>, Caitlin A. Selway<sup>1</sup>, Matilda Handsley-Davis<sup>1,2</sup>, Christina

5 Adler<sup>3</sup>, James Breen<sup>1\*</sup>, and Alan Cooper<sup>1,2</sup>

6

7 **Affiliation:**

8 <sup>1</sup>Australian Centre for Ancient DNA, University of Adelaide, Adelaide, Australia

9 <sup>2</sup>ARC Centre of Excellence for Australian Biodiversity and Heritage, University of  
10 Adelaide, Adelaide, Australia

11 <sup>3</sup>Faculty of Dentistry, University of Sydney, Sydney, Australia

12 <sup>†</sup>**Current address:** Advanced DNA, Identification, and Forensic Facility, University  
13 of Adelaide, Adelaide, Australia

14 **\*Current address:** South Australian Health and Medical Research Institute  
15 (SAHMRI), Adelaide, Australia

16

17 **Abstract:**

18 Bacteria are not only ubiquitous on earth but can also be incredibly diverse  
19 within clean laboratories and reagents. The presence of both living and dead bacteria  
20 in laboratory environments and reagents is especially problematic when examining  
21 samples with low endogenous content (*e.g.* skin swabs, tissue biopsies, ice, water,  
22 degraded forensic samples, or ancient material), where contaminants can outnumber  
23 endogenous microorganisms within samples. The contribution of contaminants within  
24 high-throughput studies remains poorly understood because of the relatively low  
25 number of contaminant surveys. Here, we examined 144 negative control samples  
26 (extraction blank and no-template amplification controls) collected in both typical  
27 molecular laboratories and an ultraclean ancient DNA laboratory over five years to  
28 characterize long-term contaminant diversity. We additionally compared the  
29 contaminant content within a homemade silica-based extraction method, commonly  
30 used to analyse low-endogenous samples, with a widely used commercial DNA  
31 extraction kit. The contaminant taxonomic profile of the ultraclean ancient DNA  
32 laboratory was unique compared to the modern molecular biology laboratories, and  
33 changed over time according to researchers, month, and season. The commercial kit  
34 contained higher microbial diversity and several human-associated taxa in comparison  
35 to the homemade silica extraction protocol. We recommend a minimum of two  
36 strategies to reduce the impacts of laboratory contaminants within low-biomass  
37 metagenomic studies: 1) extraction blank controls should be included and sequenced  
38 with every batch of extractions and 2) the contributions of laboratory contamination  
39 should be assessed and reported in each high-throughput metagenomic study.

40 **Main Text:**

41 In the new era of culture-independent microbiome research, targeted amplicon  
42 or ‘metabarcoding’ approaches are now routinely used to amplify DNA from  
43 microbial species across the tree of life. However, these methods lack the ability to  
44 select for either specific species or to exclude contaminants [1]. Although these  
45 techniques have provided invaluable insight into otherwise cryptic microbial  
46 communities, the increased sensitivity and lack of target specificity leaves microbiota  
47 studies particularly susceptible to the effects of contamination. Such effects are  
48 widespread, as several recent studies have indicated that contaminant microbial DNA  
49 can be routinely isolated from laboratory reagents and surfaces [2-4] and that this  
50 signal has significantly impacted the interpretation and characterization of microbiota  
51 in high-throughput sequencing studies. For example, Salter *et al.* recently  
52 demonstrated that bacterial DNA present in laboratory reagents is present in both  
53 quality-filtered 16S ribosomal RNA (rRNA) gene and shotgun metagenomic datasets  
54 and significantly impacts the interpretation of results [3]. Multiple microbial  
55 contaminants have already been identified within the published 1,000 Genomes  
56 dataset and other medical genomic studies [4,5]. Despite these findings, the routine  
57 assessment of microbial background contamination is still not required, or fully  
58 reported, in microbiota studies.

59 While the presence of contaminant DNA is widespread, the effects are  
60 particularly problematic in low-biomass samples that contain very little endogenous  
61 DNA [6] (*e.g.* preterm infant swabs, tissue samples, such as placenta, tumour  
62 biopsies, or breast tissue, and some environmental samples, such as ice or calcite). In  
63 low-biomass samples, a small contaminant signal from laboratory reagents can easily  
64 overpower the intrinsic signal from the sample. This is similarly an issue in current

65 palaeomicrobiology studies that examine ancient, degraded microbiota, such as  
66 mummified human tissue, preserved faeces (coprolites), or calcified dental plaque  
67 (calculus) [6-8]. In ancient samples, the amount of endogenous DNA attributed to the  
68 original source can be extremely low (*e.g.* <0.05% of the total DNA in the sample)  
69 and is damaged, fragmented, and intermixed with longer, higher-quality modern DNA  
70 fragments from contaminant species [9]. Therefore, monitoring and understanding the  
71 contributions of contaminant DNA, especially in low-biomass or ancient samples, is  
72 critical to ensure that reported results are only based on the endogenous DNA.

73       Microbial contaminant DNA (*i.e.* background or exogenous DNA) is a  
74 mixture of DNA from both environmental and laboratory sources, with the former  
75 including factors such as soil at a burial site, air within the sampling facility, and  
76 microorganisms from people touching the sample, while the latter involves reagents,  
77 glassware, labware, and surfaces [7]. Environmental contamination in low-biomass  
78 samples may be difficult to control or monitor, but the laboratory contaminants can be  
79 monitored by including extraction blank (EBC) and no-template amplification (NTC)  
80 controls and assessed using bioinformatics tools (*e.g.* SourceTracker [10]). An EBC is  
81 an empty tube introduced during the extraction steps to collect DNA from the  
82 laboratory environment and the reagents throughout processing [11]. Similarly, a  
83 NTC is simply an amplification reaction that lacks the addition of DNA from  
84 biological samples. These controls should be amplified and sequenced along with  
85 other samples and are critical steps to identify and exclude contaminant taxa from  
86 downstream analyses, reducing noise and ensuring any results are based solely on  
87 endogenous DNA [12]. Despite this, there are surprisingly few published resources  
88 describing contaminant taxa found in extraction blank or no-template controls  
89 [3,13,14].

90           In this study, we used 16S rRNA metabarcoding to characterise the  
91   contaminant diversity in 144 EBCs and NTCs using laboratory techniques specifically  
92   designed for low-biomass material. We also explored differences in microbial  
93   contamination within two different types of laboratory facilities: a state-of-the-art,  
94   purpose-built ancient DNA clean laboratory over the course of five years, and three  
95   typical modern molecular biology laboratories over one year. Lastly, we investigated  
96   differences between a common commercial DNA extraction kit and a homemade  
97   DNA extraction method typically applied in the ancient DNA field. Overall, this  
98   study is designed to assess contaminant profiles over time and identify more potential  
99   contaminant sequences in both high- and low-biomass research.

## 100 **Materials and Methods**

### 101 *Sample collection*

102 Four different types of sample were used: ancient dental calculus (calcified  
103 dental plaque), modern dental calculus, EBCs, and NTCs. Dental calculus samples  
104 were obtained from ancient and modern humans as described by Adler *et al.* [11]. A  
105 single EBC was included in each batch of extractions by treating an empty tube as if it  
106 was a biological sample throughout the DNA extraction and library preparation  
107 process. Similarly, NTC samples were created during the 16S rRNA library  
108 amplification stage by processing tubes without adding any known template DNA.  
109 Both EBCs and NTCs were subsequently included through to DNA sequencing a ratio  
110 of one control sample for every ten biological samples.

111

### 112 *Description of laboratory facilities*

113 DNA extraction occurred in two different types of laboratory facilities: a  
114 purpose-built, ultra-clean ancient DNA laboratory (ancient lab) and three typical  
115 modern molecular biology laboratories (modern labs). The ancient lab is physically  
116 remote from the university campus in a building with no other molecular biology  
117 laboratories and contains a HEPA-filtered, positive pressure air system to remove  
118 DNA and bacteria from external sources. The HEPA filter function is checked  
119 annually and changed every ten years. The surface and floors within the laboratory  
120 are cleaned weekly with a 5% bleach (NaClO) solution and are illuminated with  
121 ceiling mounted UV lights for 30 minutes each night. UV light bulbs are changed  
122 annually. Users entering the ancient lab are required to have showered, wear freshly  
123 laundered clothing, avoid the university campus prior to entry, and cannot bring  
124 personal equipment (*e.g.* phones, writing equipment, and bags) into the facility.

125 Standard personal laboratory wear includes disposable full-body suits, surgical  
126 facemasks, plastic see-through visors, and three layers of gloves to allow frequent  
127 changing without skin exposure (including one inner elbow-length pair of surgical  
128 gloves). All liquid reagents within the ancient lab are certified DNA-free, and the  
129 outer surface of all plastic ware and reagent bottles are decontaminated prior to  
130 entering the laboratory (cleaned with 5% bleach and treated with UV (2x, 40W,  
131 254nm UV tubes at a distance of 10cm for 10 minutes) within a UV oven (Ultra  
132 Violet Products). All DNA extractions and amplification preparations are performed  
133 in a room separate to sample preparation and are completed in still-air cabinets that  
134 are cleaned with bleach and UV treated for 30 minutes (3x, 15w, 253.7nm tube lamps;  
135 AURA PCR) prior to beginning any work. In addition, ancient samples from different  
136 sources (*e.g.* soil, plants, and other animals) are processed in separate, dedicated  
137 rooms to minimise cross-contamination. In contrast, the modern laboratories are  
138 located over 2 km away from the ancient lab at the University of Adelaide (n=2) and  
139 the University of Sydney (n=1). All three modern labs are typical of most molecular  
140 biology laboratories and are not routinely decontaminated and contain users that  
141 routinely use latex gloves but are not required to wear body suits or masks. DNA  
142 extracted within the modern labs comes from a wide range of sources (*e.g.* humans,  
143 mammals, and environmental samples), although microbiome extractions were only  
144 performed on days when no other material was being extracted. In all facilities, DNA  
145 was extracted and prepared for amplification in still-air cabinets that are cleaned  
146 before and after each use with 5% bleach.

147

148 *DNA extractions*

149           Several specialized DNA extraction protocols have been developed within  
150 ancient DNA studies to remove environmental contamination and enhance the  
151 recovery of the endogenous DNA. The extraction method selected for this study has  
152 previously been described for work on ancient dental calculus [12]. Each ancient  
153 sample was first decontaminated using a published protocol [11], while modern  
154 samples were not decontaminated. The decontamination procedure included exposure  
155 to UV radiation for 15 minutes on each side of the sample, submersion of the sample  
156 in 5% bleach for 5 minutes, followed by submersion in 90% ethanol for 3 minutes to  
157 remove any residual bleach, and 5 minutes of drying. Decontaminated ancient  
158 calculus was then wrapped in aluminium foil and pulverized into powder with a steel  
159 hammer and placed into a sterile 2mL tube. The EBCs were empty tubes exposed to  
160 air for 30 seconds in the same room during sample decontamination and were  
161 included in the extraction process as if they contained a sample.

162           Following decontamination, DNA was extracted using the QG-based method  
163 previously described for the extraction of ancient microbiome material [12] (referred  
164 to as ‘QG’). All reagents for the QG extraction method were prepared in a ‘sample-  
165 free’ room in the ancient DNA facility, and all reagents were aliquoted immediately  
166 upon opening and frozen until further use to avoid cross contamination. Where  
167 possible, certified ‘DNA-free’ reagents and lab ware were purchased (*e.g.* water and  
168 plastic tubes). All other reagents were opened solely within a sterilized hood within  
169 the ancient DNA facility. All chemicals were prepared for the extraction with  
170 previously unopened DNA and RNA-free certified water (Ultrapure water;  
171 Invitrogen). Briefly, 1.8 mL of 0.5 M ethylenediaminetetraacetic acid (EDTA; Life  
172 Tech), 100  $\mu$ L of 10% sodium dodecyl sulphate (SDS; Life Tech), and 20  $\mu$ L of 20  
173 mg/mL proteinase K (proK; Life Tech) were added to each sample, and the mixture



174 was rotated at 55°C overnight to decalcify the sample. Released DNA was then  
175 purified by adding silica (silicon dioxide; Sigma Aldrich) and 3 mL of binding buffer  
176 (e.g. QG buffer; Qiagen; modified to contain 5.0M GuSCN; 18.1mM Tris-HCl;  
177 25mM NaCl; 1.3% Triton X-100) [15]. The silica was pelleted, washed twice in 80%  
178 ethanol, dried, and resuspended in 100 µL of TLE buffer (10mM Tris, 1mM EDTA,  
179 pH 8) twice to elute the DNA, which was then stored at -20°C until amplification. All  
180 chemicals were prepared for the extraction with previously unopened DNA and RNA-  
181 free certified water (Ultrapure water; Invitrogen). For QG extractions performed in  
182 the modern laboratories, unopened aliquots of DNA extraction reagents were  
183 transported to the modern laboratory, and the modern samples were extracted  
184 following the ancient DNA approach described above.

185         In contrast to ancient DNA extractions, many modern microbiome studies  
186 decrease cost and time by using commercial DNA extraction kits to isolate DNA. In  
187 order to compare the nature and extent of contaminant DNA in the ancient method to  
188 a typical commercial microbiome DNA extraction kit, we analysed an additional set  
189 of EBCs created during extractions using a PowerBiofilm® DNA Isolation Kit  
190 (MOBIO) from concurrent oral microbiome research conducted in the same modern  
191 labs (referred to as ‘kit’ EBCs).

192

### 193 *Library Preparation*

194         To minimise additional variables, a simple 16S rRNA amplicon sequencing  
195 approach was used in this study to compare the different sample types. Briefly, the V4  
196 region of the bacterial 16S rRNA encoding gene was targeted for amplification using  
197 degenerate Illumina fusion primers, as previously described [1]: forward primer 515F  
198 (AATGATACGGCGACCACCGAGA TCTACACTATGGTAATTGTGTGCCA

199 GCMGCCGCGGTAA) and barcoded reverse primer 806R (CAAGCAGAAGA  
200 CGGCATACGAGATnnnnnnnnnnnnAGTCAGTCAGCCGGACTACHVGGGTW  
201 TCTAAT) [1]. The string of n's in the reverse primer refers to the unique 12 bp  
202 barcode used for each sample. Primers were resuspended in TLE buffer within the  
203 ancient facility and distributed to the modern laboratory. In both facilities, all PCR  
204 amplification reactions were prepared using ultraclean reagents with strict ancient  
205 DNA protocols [9]. Each PCR reaction contained 17.25  $\mu$ L DNA-free water  
206 (Ultrapure water; Invitrogen), 2.5  $\mu$ L 10X reaction buffer (20 mM Tris-HCl, 10 mM  
207  $(\text{NH}_4)_2\text{SO}_4$ , 10 mM KCl, 2 mM  $\text{MgSO}_4$ , 0.1% Triton® X-100, pH 8.8@25°C;  
208 ThermoPol Buffer; New England Biolabs;), 0.25  $\mu$ L Taq polymerase (Platinum Taq  
209 DNA Polymerase High Fidelity; Thermo Fisher Scientific), 1.0  $\mu$ L  $\text{MgCl}_2$  (Thermo  
210 Fisher Scientific), 1.0  $\mu$ L of each primer at 10  $\mu$ M (IDT), and 2.0  $\mu$ L of genomic  
211 DNA; each reaction was performed in triplicate. 16S rRNA amplification occurred  
212 under the following conditions: 95°C for 5 min; 37 cycles of 95°C for 0.5 min, 55°C  
213 for 0.5 min, 75°C for 1 min; and 75°C for 10 min. NTC reactions were also included  
214 in triplicate. PCR products were quantified (QuBit; Thermo Fisher Scientific) and  
215 pooled in batches of 30 samples at equal nanomolar concentrations prior to  
216 purification (Ampure; New England Biolabs). Each pool of purified PCR products  
217 was quantified (TapeStation; Agilent) before being combined into a single library. All  
218 amplicons were sequenced using the Illumina MiSeq 2x150 bp (300 cycle) kit.

219

## 220 *Bioinformatics Analysis*

221 After sequencing, fastq files for the forward and reverse reads were created  
222 using the Illumina CASAVA pipeline (version 1.8.2). Overlapping forward and  
223 reverse reads were joined (based on a maximum of 5% nucleotide difference over a

224 minimum 5bp overlap) using BBmerge (sourceforge.net/projects/bbmap/). Only  
225 successfully merged sequences were used in downstream analyses. The resulting fastq  
226 file was then imported into QIIME (MacQIIME v1.8.0), a bioinformatics pipeline-  
227 based software for the analysis of metagenomic data [16]. All further analysis of the  
228 amplicon datasets was conducted within the QIIME package. Libraries were  
229 demultiplexed using a Phred base quality threshold of less than or equal to 20, with no  
230 errors allowed in the barcodes. Operational taxonomic units (OTUs) were determined  
231 by clustering sequences at 97% similarity using UClust [17], and representative  
232 sequences (*i.e.* cluster seed) were selected for each cluster. By default, clusters with  
233 fewer than five sequences were eliminated from the analysis to reduce noise and  
234 spurious findings. Lastly, 16S rRNA gene sequences were given taxonomic  
235 assignments using the Greengenes 13\_8 database if the sequence was at least 80%  
236 similar [18,19]. Taxonomic diversity measurements (alpha- and beta-diversity) and  
237 statistical analyses were performed and visualized in QIIME. Samples were rarefied  
238 to a minimum of 150 sequences (Figure 2) and a maximum of 1,000 sequences for  
239 diversity analyses, as many controls contained low sequence counts. Statistical  
240 differences between groups were identified using a PERMANOVA test for beta  
241 diversity (adonis), nonparametric t-test for alpha diversity (Monte Carlo), or Kruskal-  
242 Wallis and G-tests for detection of specific taxa associated with different treatments.

## 243 **Results**

### 244 **Low bacterial diversity is routinely obtained from laboratory extraction**

#### 245 **controls.**

246           The EBCs and NTCs were sequenced alongside the ancient and modern  
247 biological samples; all sample types were pooled together at equimolar  
248 concentrations. Despite the equimolar pooling, we routinely obtained fewer reads  
249 from control samples (EBCs and NTCs) compared to the dental calculus samples,  
250 likely due to poor amplification of control samples, the quantification of poor DNA  
251 libraries, and clean-up strategy employed. Compared to the ancient and modern  
252 calculus samples, 6.4-fold fewer reads on average were obtained from EBCs, and 7.6-  
253 fold fewer were obtained from NTCs (Figure 1A). As well as containing fewer reads  
254 overall, the control samples contained fewer taxa that could be identified than the  
255 biological samples. In the ancient laboratory, 719 total OTUs were observed in  
256 ancient biological samples (calculus), while only 415 were identified in the EBCs and  
257 228 in NTCs (Figure 1B). In the modern laboratories, 286 total OTUs were described  
258 in the modern calculus samples, versus 208 in the EBCs and 102 in the NTCs. The  
259 OTU diversity that appears within the EBCs is similar to the differences in diversity  
260 observed between modern and ancient biological specimens, potentially reflecting  
261 minor cross contamination during DNA extraction. Across different extraction  
262 methods, the EBCs for the commercial extraction kit contained 261 OTUs, around  
263 25% more than the in-house method conducted in the modern laboratory. Overall, the  
264 laboratory controls were largely dominated by a single phylum, Proteobacteria  
265 (Figure 2), and alpha diversity was significantly lower than in the biological samples  
266 extracted within the same laboratory (Monte Carlo;  $p < 0.0001$  and  $T \geq 11.0$  in all  
267 comparisons between any group of controls and all biological samples). While the

268 diversity within laboratory controls was considerably lower than the biological  
269 samples, these results demonstrate the extent of background microbial contamination  
270 even within an ultra-clean laboratory with ‘DNA-free’ reagents, and clearly highlight  
271 the need to routinely monitor and report background contamination within all research  
272 facilities.

273

274 **Extraction blank controls detect >50% more contaminant taxa than no-template**  
275 **controls**

276 Many studies, including some in palaeomicrobiological research, have simply  
277 reported failed EBC and NTC amplification reactions (often via simple visual  
278 comparison on an agarose gel) as a means to determine that their samples are free  
279 from contamination [21,22]. This approach is clearly inadequate, and importantly,  
280 also fails to appreciate the extent of contamination introduced during the extraction  
281 process, even though this issue is well described in the literature [14,23,24]. In our  
282 comparisons, EBCs were taxonomically far more diverse than NTCs (Figure 1B) and  
283 contained more microbial genera (415 versus 228 genera in the ancient lab, and 208  
284 versus 102 genera in the modern labs). This pattern suggests that if just NTCs were  
285 used to monitor the presence of laboratory contamination, at least 53% of the total  
286 laboratory contamination may go undetected. These results highlight the need for the  
287 standard reporting of both EBCs and NTCs in both modern and ancient metagenomics  
288 research.

289 We examined the impact of overall laboratory contamination on ancient  
290 samples by bioinformatically filtering (removing) all contaminant OTUs from ancient  
291 dental calculus samples. For the ancient samples prepared with the specialised  
292 facility, an average 92.5% of the sequence reads were contaminants, but importantly,

293 only accounted for 28% of the genera identified within these samples. This indicates  
294 that endogenous signal can be identified even in low-endogenous samples once  
295 contaminant taxa are removed.

296

### 297 **Extraction blank and no-template controls reflect laboratory environment**

298 Previous studies have detected differences in the contaminants present in  
299 different laboratory facilities [3]. In our study, the laboratory environments explained  
300 more of the taxonomic diversity observed in the EBCs and NTCs than the extraction  
301 or amplification methods used to generate them (Figure 3). For example,  
302 Proteobacteria dominated the EBCs and NTCs from the ancient laboratory, while  
303 Firmicutes were more dominant in EBC and NTC controls from the modern  
304 laboratories. In fact, different types of controls (*i.e.* EBC or NTC) from the same  
305 laboratory clustered with others of the same sample type in a Principle Coordinates  
306 Analysis (PCoA) of unweighted UniFrac values ( $p < 0.001$ ,  $R^2 = 0.083$ ; Figure 3A),  
307 despite large variation and significant differences in each lab (Figure 1B). Despite the  
308 sample type (*e.g.* EBC or NTC) driving the majority of the signal, taxa distinguishing  
309 each laboratory could also be detected, with specific *Paenibacillus* taxa only found in  
310 the modern laboratories, while the ancient laboratory contained both bacterial  
311 (*Comamonas*, *Pseudomonas*, *Acinetobacter*, *Enterobacter*) and archaeal  
312 (*Methanobrevibacter*) taxa that were not observed in the modern labs. In addition,  
313 several bacterial taxa were identified in both lab types, but were significantly  
314 increased in one location. The ancient laboratory contained significantly higher levels  
315 of certain *Acinetobacter*, *Comamonas*, and *Pseudomonas* taxa compared to the  
316 modern laboratories (Kruskal-Wallis; Bonferroni-corrected  $p < 0.05$ ), while  
317 Erythrobacteraceae and *Staphylococcus* taxa were increased in abundance in the

318 modern laboratories. With the exception of the *Staphylococcus* taxa, each of these  
319 taxa had been previously identified in laboratory reagents [3]. This suggests that some  
320 contaminant taxa are relatively universal across laboratories and are therefore either  
321 introduced in the manufacturing of laboratory reagents and labware or have a  
322 fundamental niche in low-nutrient, laboratory environments.

323 We next examined the genera that were likely to be in the reagents  
324 themselves, rather than the laboratories, by looking for shared taxa within the EBCs  
325 generated during extractions in both the ancient lab and modern labs. Of the 69  
326 dominant genera (*i.e.* observed at >0.1%), 17 were present in the reagents used in the  
327 in-house QG DNA extraction process used in both types of facility. These taxa  
328 included *Cloacibacterium*, *Flavobacterium*, *Paenibacillus*, *Novosphingobium*,  
329 *Sphingomonas*, *Limnohabitans*, *Tepidomonas*, *Cupriavidus*, *Ralstonia*, *Acinetobacter*,  
330 *Enhydrobacter*, *Pseudomonas*, and *Stenotrophomonas*, and four unidentified genera  
331 within Comamonadaceae, Erythrobacteraceae, Enterobacteriaceae, and  
332 Pseudomonadaceae (Table 1). Within the ancient laboratory EBCs, the 26 most  
333 dominant genera included *Acinetobacter* (39%), followed by three genera within the  
334 Comamonadaceae family (totalling 11.3%), *Pseudomonas* (8%), *Novosphingobium*  
335 (1.5%), *Ralstonia* (1%), *Cloacibacterium* (1%), and others (Table 1). In the EBCs  
336 from the modern laboratories, *Paenibacillus* was the most prevalent of the 43  
337 dominant genera (46%), while two Erythrobacteraceae (16.5%), Comamonadaceae  
338 (6.1%), *Cloacibacterium* (3.9%), *Corynebacterium* (2.5%), *Enterococcus* (2.5%),  
339 *Staphylococcus* (2.2%), *Enhydrobacter* (1.8%), Microbacteriaceae (1.7%), a  
340 Pseudomonadaceae (1.4%), *Ralstonia* (1.3%), and *N09* (1.2%) taxa were the next  
341 most prevalent within the reagents (Table 1). Although the same extraction method  
342 and reagents were used, only three of the dominant taxa (*i.e.* identified at >1%

343 prevalence) were the same within both laboratories (Comamonadaceae,  
344 *Cloacibacterium*, Pseudomonadaceae), highlighting the heterogeneity of taxa  
345 identified with EBCs. While many of these taxa have been previously identified as  
346 laboratory contaminants, the diversity within the modern laboratories also includes  
347 some human-associated taxa that have been cultured from the oral cavity, gut, and  
348 skin (e.g. *Corynebacterium*, *Enterococcus*, and *Staphylococcus*, respectively). This  
349 suggests that the additional precautionary measures used within the ancient laboratory  
350 help reduce the introduction of human-associated microorganisms in metagenomic  
351 data sets.

352

### 353 **DNA extraction kits contain microbiota indicative of the human mouth**

354 We compared the diversity of taxa present within EBCs from the widely used  
355 ancient DNA extraction method and the commercial PowerBiofilm® DNA Isolation  
356 Kit, used in the same modern laboratory. While the latter kit has been shown to have  
357 the lowest bacterial background contamination of standard microbiome kits [3],  
358 microbial diversity within the kit EBCs was significantly higher than the in-house QG  
359 method (Figure 1B), suggesting that kit-based DNA extractions are more prone to  
360 background contamination. On a PCoA plot constructed using unweighted UniFrac  
361 distances, the kit EBCs clustered away from the QG EBCs and NTCs, including those  
362 processed in the same laboratory (adonis;  $p < 0.001$ ,  $R^2 = 0.04$ ; Figure 4A),  
363 demonstrating that a unique microbial community profile originates from the kit. This  
364 profile was not solely dominated by Firmicutes, like the other control samples from  
365 the modern lab, but contained taxa from several unique phyla (Acidobacteria,  
366 Gemmatimonadetes, and Verrucomicrobia). These unique phyla included 15 distinct  
367 taxa that were also not observed in the extractions using the ancient DNA extraction



368 method, including *Alicyclobacillus* (n=9), *Halomonas*, *Pseudonocardia*, *Vogesella*,  
369 *Allobaculum* (n=2), and *Akkermansia* taxa (Kruskal-Wallis;  $p < 0.05$ ; Table 2).  
370 Several of these taxa are known to be resistant to sterilization treatments, including  
371 pasteurization [25]. In addition, several OTUs were more likely to be found in higher  
372 abundances in the kit EBCs than any other control samples (G-test;  $p < 0.05$ ) and  
373 include specific *Bradyrhizobiaceae*, *Neisseria*, *Corynebacterium*, *Fusobacterium*,  
374 *Streptococcus*, *Micrococcus*, and *Halomonas* taxa. While *Bradyrhizobium* and  
375 *Micrococcus* have previously been identified as laboratory contaminants [3,4], the  
376 remaining taxa are commonly found in the human mouth. Concerningly, many of  
377 these human oral taxa have been previously reported from low-biomass samples, such  
378 as placenta and tumor tissue, which were examined without EBCs [22,26]. This  
379 suggests that DNA extraction kits used in modern molecular biology laboratories may  
380 be contributing unique microbial signals in addition to those generated within the  
381 laboratory environment.

382

### 383 **Contaminant taxa change over time**

384 Much of the variation identified in this study is laboratory-specific, so in order  
385 to test how seasonal changes, different researchers, or time might alter the microbial  
386 diversity observed in controls, we assessed the EBC and NTC records from the  
387 ancient lab facility over five years (2012-2016). Bacterial community structure in the  
388 ancient lab was linked to the researcher (adonis;  $p=0.001, R^2=0.073$ ), the extraction  
389 year (adonis;  $p < 0.01, R^2=0.022$ ), the extraction month (adonis;  $p < 0.001, R^2=0.044$ ;  
390 Figure 4B), and wet / dry seasons (adonis;  $p=0.001, R^2=0.081$ ). However, each of  
391 these signals was less significant and drove less variation within the data set when  
392 compared to the differences observed between laboratory facilities or between

393 extraction methods. Very few specific taxa were significantly associated with  
394 temporal variation, although linked changes in overall diversity were observed. 32  
395 OTUs were associated with the month in which the extraction was performed and  
396 were largely present during dry months (Oct-January; dominated by  
397 *Comamonadaceae* (2), *Bradyrhizobiaceae* (11), and *Gemmatimonadetes* (2) taxa;  
398 Kruskal-Wallis; Bonferroni corrected  $p < 0.05$ ), while only two OTUs  
399 (*Thermobispora* and *Actinomycetales* taxa) were linked to wet seasons. Interestingly,  
400 five OTUs (*Leptotrichia*, *Comamonadaceae* (3), and *Burkholderia*) were also  
401 associated with the lab researcher (Kruskal-Wallis; Bonferroni corrected  $p < 0.05$ ).  
402 While we cannot rule out the confounding nature of these variables (*e.g.* links  
403 between different researchers being more active in the laboratories at different times),  
404 these observations suggest that contaminant taxa change over time and need to be  
405 continually monitored, even in the cleanest molecular facilities.

## 406 **Discussion**

### 407 *Overview*

408 While several studies have now reported on contaminant DNA within laboratory  
409 reagents, the systematic inclusion of extraction blank controls has not yet been widely  
410 embraced in metagenomic research. Several studies on human microbiota have been  
411 criticised for their lack of careful controls [14,24,27], as the unfounded results of such  
412 studies have potentially serious repercussions and have hindered scientific progress. A  
413 similar phenomenon occurred with the new field of ancient DNA in the early 1990s,  
414 when research teams, reviewers, and editors failed to adequately test for  
415 contamination [28–30], leading to many spurious results. This seriously undermined  
416 the credibility of ancient DNA research [23] and resulted in the formation of a robust  
417 set of guidelines [9]. Here, we surveyed the largest collection of extraction blank and  
418 no-template amplification negative control samples to date (n=144) with the goal of  
419 better describing contaminant DNA in microbiome studies to avoid pitfalls similar to  
420 those observed in the ancient DNA field.

421

### 422 *Contaminant diversity remains underestimated*

423 We identified 861 contaminant taxa over five years within a single ultra-clean  
424 laboratory facility. Before this publication, the largest collection of contaminant taxa  
425 was published by Salter *et al.* and included 93 contaminant genera [3]. Within our  
426 study, we found 71 of the taxa identified by Salter *et al.* across all labs and  
427 methodologies. However, only 29.5% of the Salter *et al.* taxa (21 of their 71 taxa)  
428 were identified as dominant taxa within our study across all methods and labs. This  
429 indicates that laboratory microbial contamination is not yet well described and is  
430 likely to be unique across different laboratories, protocols, seasons, and researchers.

431 Of the 21 taxa shared across studies, four genera (*Ralstonia*, *Acinetobacter*,  
432 *Pseudomonas*, and *Stenotrophomonas*) have now been routinely identified in at least  
433 four of the six publications that examine laboratory contamination [2–4,13,31,32]. All  
434 of these taxa are classified as Proteobacteria, as are 55% of the dominant contaminant  
435 taxa (38/69) identified within our study and 63% (34/92) within the Salter *et al.* study.  
436 While contamination is highly diverse, this finding indicates that Proteobacteria  
437 appear to be the most widespread source of laboratory contamination. Proteobacteria  
438 encompasses several families of bacteria that are known to be UV and oxidation  
439 resistant.

440

441 *Analysing contaminants is critical for the successful interpretation of low-biomass*  
442 *samples*

443 We identified several human oral microbiota taxa present in the commercial  
444 extraction kit, including *Fusobacterium*, *Streptococcus*, and *Corynebacterium* [33],  
445 while previous studies have previously identified additional human oral taxa  
446 contaminants, including *Haemophilus* and *Peptostreptococcus* [31]. Worryingly, one  
447 of these taxa in particular, *Fusobacterium*, has recently been identified both as a  
448 component of the ‘placental microbiome’, and as a component of breast cancer tissue,  
449 in low-biomass studies that did not consider background contamination from  
450 laboratory reagents or environments [22,26,34]. It remains unclear whether this taxon  
451 is a laboratory contaminant, or whether it can escape the oral cavity and contribute to  
452 inflammatory processes elsewhere in the body. Other non-oral taxa identified within  
453 this study as contaminants have also previously been reported as important taxa  
454 within studies that failed to use controls [35]. There is clearly a need for more detailed  
455 metagenomic studies, or the use of improved ‘oligotyping’ 16S rRNA gene analysis

456 methods of contaminant taxa, to better identify specific strain differences and  
457 determine whether such taxa are contaminants or are actually present in the body and  
458 can cause systemic disease. The lack of contaminant assessment has already  
459 negatively impacted the metagenomics field [14], and it is critical that editors and  
460 reviewers are aware of this issue.

461

462 *Bacterial DNA is still obtained from ultra-clean reagents in ultra-clean facilities – no*  
463 *facility is contaminant free.*

464 Contaminant taxa were identified in EBCs and NTCs within five different  
465 laboratory facilities, including a state-of-the-art, ultra-clean ancient DNA facility. In  
466 the latter, the specialized conditions and procedures did not prevent low levels of  
467 bacterial diversity, and a wide-range of contaminant taxa was still observed – with the  
468 dominant taxa all known to resist disinfectant measures, including treatment with  
469 aromatic or oxidative compounds (*i.e.* bleach) (*Acinetobacter* [36], *Comamonas* [37],  
470 or other disinfectant compounds (*Pseudomonas* [38])). These mechanisms of  
471 disinfection resistance have contributed to nosocomial infections in hospitals (*i.e.*  
472 *Acinetobacter* [39]) and to contamination of cell culture reagents (*e.g.* *Achromobacter*  
473 [40]). Of note, *Deinococcus*, a taxa that can notoriously survive UV irradiation [41],  
474 *Alicyclobacillus*, known to survive pasteurization [25], and other species known to  
475 degrade oxidative compounds (*e.g.* *Pasteurella* [42]) were not observed in the  
476 specialised ancient DNA facility, but were identified within the modern laboratory.  
477 While measures to reduce contamination have prevented the introduction of human-  
478 associated microorganisms into the ancient lab EBCs, these numerous strategies did  
479 not eliminate or completely prevent the introduction of bacterial contaminant DNA.  
480 This suggests that each research facility will likely contain unique microorganisms

481 able to resist decontamination measures, although it is plausible that contaminant  
482 DNA could be routinely introduced into the facility from other source and represents  
483 living species found elsewhere, rather than in the actual facilities utilized in this study.  
484 Regardless, this finding reiterates that every laboratory is susceptible to bacterial  
485 DNA contamination and that researchers should consistently monitor the  
486 contamination present within their own facility as a best practice.

487

488 *Non-kit approaches provide unique contaminant signals*

489 In this study, we identified several taxa in a commonly used DNA extraction kit  
490 that were absent in the homemade ancient DNA extraction method. The ancient DNA  
491 method was developed to obtain more DNA from samples with low-endogenous  
492 DNA, and this and other similar extraction methods are now routinely applied in  
493 ancient DNA studies to examine ancient microbiota and metagenomes [11,43,44]. In  
494 this study, the ancient DNA method produced extraction blanks that had lower  
495 microbial diversity and were less likely to contain human oral taxa than extraction  
496 blanks generated using a commercial kit. This suggests that commercially available  
497 kits may contain more DNA contamination than homemade methods that source clean  
498 materials. It is likely that the assembly of kit-based reagents in a separate facility  
499 provides an additional opportunity to contaminate reagents with laboratory DNA.  
500 This also suggests that ancient DNA extraction methods and strategies could be  
501 applied in modern low-biomass studies to potentially reduce contaminants that  
502 originate from humans.

503 In the future, studies of low-biomass or low endogenous count routinely employ  
504 shotgun sequencing to better identify contaminant taxa, as strain-level identifications  
505 increase specificity in tracking contaminants. In many cases, the ancient DNA field

506 has now shifted to utilizing shotgun DNA sequencing as the gold-standard method  
507 (12). Shotgun sequencing also produces many other important molecular signals (*e.g.*  
508 signatures of ancient DNA damage), functional analysis, and strain markers to  
509 delineate which species are endogenous and which are contaminants. For example,  
510 distinct strains within a single genus could be identified as either a contaminant or an  
511 endogenous species, which would be critical for examining oral species in low-  
512 biomass tissues. In addition, damage profiles of DNA contamination could be used to  
513 distinguish fragmented, extracellular DNA within reagents versus species living  
514 within the laboratory. Current approaches aimed at eliminating contamination in  
515 shotgun sequenced metagenomes have had varied levels of success (reviewed in [3]),  
516 and new bioinformatic tools and models will undoubtedly improve our ability to  
517 identify and account for contaminant signals within metagenomic data sets (45).  
518 However, the need to routinely include EBCs and NTCs within microbiome data sets  
519 will likely always be necessary when examining low biomass samples, even when  
520 other methodologies, such as shotgun metagenomic sequencing, are applied.

521

522 *Contamination assessment needs to be routinely reported as a publication*  
523 *requirement.*

524 Contaminant sequences introduced during sample processing and library  
525 construction significantly contribute to signals from biological samples, especially  
526 those that are low-endogenous or low-biomass in nature. This study confirms that  
527 contaminant taxa that are unique to the extraction method and facility, are related to  
528 the material being extracted, and change over time within a single facility, although  
529 these levels of contamination can be somewhat mitigated by routine decontamination  
530 measures of the facility and potentially the reagents themselves (46). Therefore, the

531 presence of contaminants needs to be considered in all future studies of both human  
532 and environmental microbiota. We recommend that all researchers routinely record  
533 potential sources of contamination DNA (reagent batches or lot numbers; dates of  
534 extractions and amplifications; researchers performing such duties, *etc.*) and critically  
535 propose that researchers routinely include extraction blank controls during the  
536 extraction process to monitor the bacterial DNA introduced into their samples.  
537 Minimally, one control should be included in at least every batch of extractions and  
538 amplifications performed. Adding carrier DNA into control samples may also  
539 improve contaminant DNA detection (47). If controls were not included in existing  
540 data sets, an assessment of previously identified contaminant taxa within study  
541 datasets should also be minimally included in the published analysis. For example,  
542 researchers could report how many known contaminant taxa are present within a  
543 dataset or provide evidence to demonstrate that the removal of known contaminants  
544 does not impact the sample signal or conclusions of the paper. To facilitate this  
545 process, we have included a text file that includes a list of all the contaminant taxa  
546 observed here, as well as a separate file of only the dominant taxa. The inclusion of  
547 negative extraction blank controls should be regarded as minimal requirements for  
548 any metagenomics research and should become standard requirements of reviewers  
549 and journal editors.



550 **Acknowledgements**

551 We would like to acknowledge Paul Gooding at the Australian Genomic Research

552 Facility for technical help during DNA sequencing. This research was funded by the

553 Australian Research Council (L.S.W; A.C.).

554

## 555 References

- 556 1. Caporaso JG, Lauber CL, Walters WA *et al.* Ultra-high-throughput microbial  
557 community analysis on the Illumina HiSeq and MiSeq platforms. *ISME J*  
558 2012;**6**:1621–4.
- 559 2. Tanner MA, Goebel BM, Dojka MA *et al.* Specific Ribosomal DNA Sequences  
560 from Diverse Environmental Settings Correlate with Experimental Contaminants.  
561 *Appl Environ Microbiol* 1998;**64**:3110–3.
- 562 3. Salter SJ, Cox MJ, Turek EM *et al.* Reagent and laboratory contamination can  
563 critically impact sequence-based microbiome analyses. *BMC Biology* 2014;**12**, DOI:  
564 10.1186/s12915-014-0087-z.
- 565 4. Laurence M, Hatzis C, Brash DE. Common Contaminants in Next-Generation  
566 Sequencing That Hinder Discovery of Low-Abundance Microbes. *PLoS One* 2014;**9**,  
567 DOI: 10.1371/journal.pone.0097876.
- 568 5. Kearney MF, Spindler J, Wiegand A *et al.* Multiple Sources of Contamination in  
569 Samples from Patients Reported to Have XMRV Infection. *PLoS One* 2012;**7**, DOI:  
570 10.1371/journal.pone.0030889.
- 571 6. Weiss S, Amir A, Hyde ER *et al.* Tracking down the sources of experimental  
572 contamination in microbiome studies. *Genome Biol* 2014;**15**, DOI: 10.1186/s13059-  
573 014-0564-2.
- 574 7. Weyrich LS, Dobney K, Cooper A. Ancient DNA analysis of dental calculus.  
575 *Journal of Human Evolution* 2015, DOI: 10.1016/j.jhevol.2014.06.018.
- 576 8. Warinner C, Speller C, Collins MJ. A new era in palaeomicrobiology: prospects for  
577 ancient dental calculus as a long-term record of the human oral microbiome.  
578 *Philosophical Transactions of the Royal Society of London B: Biological Sciences*  
579 2015;**370**:20130376.
- 580 9. Cooper A, Poinar HN. Ancient DNA: Do It Right or Not at All. *Science*  
581 2000;**289**:1139–1139.
- 582 10. Knights D, Kuczynski J, Charlson ES *et al.* Bayesian community-wide culture-  
583 independent microbial source tracking. *Nat Meth* 2011;**8**:761–3.
- 584 11. Adler CJ, Dobney K, Weyrich LS *et al.* Sequencing ancient calcified dental  
585 plaque shows changes in oral microbiota with dietary shifts of the Neolithic and  
586 Industrial revolutions. *Nat Genet* 2013;**45**:450–5.
- 587 12. Weyrich LS, Duchene S, Soubrier J *et al.* Neanderthal behaviour, diet, and disease  
588 inferred from ancient DNA in dental calculus. *Nature* 2017;**544**:357–61.
- 589 13. Glassing A, Dowd SE, Galandiuk S *et al.* Inherent bacterial DNA contamination  
590 of extraction and sequencing reagents may affect interpretation of microbiota in low  
591 bacterial biomass samples. *Gut Pathogens* 2016;**8**:24.

- 592 14. Lauder AP, Roche AM, Sherrill-Mix S *et al.* Comparison of placenta samples  
593 with contamination controls does not provide evidence for a distinct placenta  
594 microbiota. *Microbiome* 2016;**4**:29.
- 595 15. Rohland N, Hofreiter M. Ancient DNA extraction from bones and teeth. *Nat*  
596 *Protocols* 2007;**2**:1756–62.
- 597 16. Caporaso JG, Kuczynski J, Stombaugh J *et al.* QIIME allows analysis of high-  
598 throughput community sequencing data. 2010:335–6.
- 599 17. Edgar RC. Search and clustering orders of magnitude faster than BLAST.  
600 2010:2460–1.
- 601 18. DeSantis TZ, Hugenholtz P, Larsen N *et al.* Greengenes, a Chimera-Checked 16S  
602 rRNA Gene Database and Workbench Compatible with ARB. *Appl Environ*  
603 *Microbiol* 2006;**72**:5069–72.
- 604 19. Wang Q, Garrity GM, Tiedje JM *et al.* Naïve Bayesian Classifier for Rapid  
605 Assignment of rRNA Sequences into the New Bacterial Taxonomy. *Appl Environ*  
606 *Microbiol* 2007;**73**:5261–7.
- 607 20. Quast C, Pruesse E, Yilmaz P *et al.* The SILVA ribosomal RNA gene database  
608 project: improved data processing and web-based tools. *Nucl Acids Res*  
609 2013;**41**:D590–6.
- 610 21. Santiago-Rodriguez TM, Fornaciari G, Luciani S *et al.* Gut Microbiome of an  
611 11th Century A.D. Pre-Columbian Andean Mummy. *PLOS ONE* 2015;**10**:e0138135.
- 612 22. Aagaard K, Ma J, Antony KM *et al.* The Placenta Harbors a Unique Microbiome.  
613 *Sci Transl Med* 2014;**6**:237ra65-237ra65.
- 614 23. Weyrich LS, Llamas B, Cooper A. Reply to Santiago-Rodriguez et al.: Was luxS  
615 really isolated from 25- to 40-million-year-old bacteria? *FEMS Microbiol Lett*  
616 2014;**353**:85–6.
- 617 24. Kliman HJ. Comment on “The placenta harbors a unique microbiome.” *Science*  
618 *Translational Medicine* 2014;**6**:2541e4-2541e4.
- 619 25. Chang S-S, Kang D-H. Alicyclobacillus spp. in the Fruit Juice Industry: History,  
620 Characteristics, and Current Isolation/Detection Procedures. *Critical Reviews in*  
621 *Microbiology* 2004;**30**:55–74.
- 622 26. Hieken TJ, Chen J, Hoskin TL *et al.* The Microbiome of Aseptically Collected  
623 Human Breast Tissue in Benign and Malignant Disease. *Scientific Reports*  
624 2016;**6**:30751.
- 625 27. Eisenhofer R, Cooper A, Weyrich LS. Reply to Santiago-Rodriguez et al: Proper  
626 authentication of ancient DNA is essential. *FEMS Microbiol Ecol* 2017, DOI:  
627 10.1093/femsec/fix042.
- 628 28. Priest FG. Age of bacteria from amber. *Science* 1995;**270**:2015; author reply  
629 2016-2017.

- 630 29. Beckenbach AT. Age of bacteria from amber. *Science* 1995;**270**:2015-2016;  
631 author reply 2016-2017.
- 632 30. Austin JJ, Smith AB, Fortey RA *et al.* Ancient DNA from amber inclusions: a  
633 review of the evidence. 1998.
- 634 31. Barton HA, Taylor NM, Lubbers BR *et al.* DNA extraction from low-biomass  
635 carbonate rock: an improved method with reduced contamination and the low-  
636 biomass contaminant database. *J Microbiol Methods* 2006;**66**:21–31.
- 637 32. Grahn N, Olofsson M, Ellnebo-Svedlund K *et al.* Identification of mixed bacterial  
638 DNA contamination in broad-range PCR amplification of 16S rDNA V1 and V3  
639 variable regions by pyrosequencing of cloned amplicons. *FEMS Microbiol Lett*  
640 2003;**219**:87–91.
- 641 33. Chen T, Yu W-H, Izard J *et al.* The Human Oral Microbiome Database: a web  
642 accessible resource for investigating oral microbe taxonomic and genomic  
643 information. *Database (Oxford)* 2010;**2010**:baq013.
- 644 34. Kostic AD, Gevers D, Pedamallu CS *et al.* Genomic analysis identifies  
645 association of *Fusobacterium* with colorectal carcinoma. *Genome Res* 2012;**22**:292–8.
- 646 35. Mayneris-Perxachs J, Bolick DT, Leng J *et al.* Protein- and zinc-deficient diets  
647 modulate the murine microbiome and metabolic phenotype. *Am J Clin Nutr*  
648 2016:ajcn131797.
- 649 36. Ridgway HF, Olson BH. Chlorine resistance patterns of bacteria from two  
650 drinking water distribution systems. *Appl Environ Microbiol* 1982;**44**:972–87.
- 651 37. Liu L, Zhu W, Cao Z *et al.* High correlation between genotypes and phenotypes of  
652 environmental bacteria *Comamonas testosteroni* strains. *BMC Genomics* 2015;**16**,  
653 DOI: 10.1186/s12864-015-1314-x.
- 654 38. Sagripanti JL, Bonifacino A. Resistance of *Pseudomonas aeruginosa* to liquid  
655 disinfectants on contaminated surfaces before formation of biofilms. *J AOAC Int*  
656 2000;**83**:1415–22.
- 657 39. Dent LL, Marshall DR, Pratap S *et al.* Multidrug resistant *Acinetobacter*  
658 *baumannii*: a descriptive study in a city hospital. *BMC Infectious Diseases*  
659 2010;**10**:196.
- 660 40. Gray JS, Birmingham JM, Fenton JI. Got black swimming dots in your cell  
661 culture? Identification of *Achromobacter* as a novel cell culture contaminant.  
662 *Biologicals* 2010;**38**:273–7.
- 663 41. Krisko A, Radman M. Biology of Extreme Radiation Resistance: The Way of  
664 *Deinococcus radiodurans*. *Cold Spring Harb Perspect Biol* 2013;**5**:a012765.
- 665 42. Wackett LP, Logan MSP, Blocki FA *et al.* A mechanistic perspective on bacterial  
666 metabolism of chlorinated methanes. *Biodegradation* 1992;**3**:19–36.

- 667 43. Willerslev E, Hansen AJ, Binladen J *et al.* Diverse plant and animal genetic  
668 records from Holocene and Pleistocene sediments. *Science* 2003;**300**:791–5.
- 669 44. Gilbert MTP, Jenkins DL, Götherstrom A *et al.* DNA from Pre-Clovis Human  
670 Coprolites in Oregon, North America. *Science* 2008;**320**:786–9.
- 671 45. J Lu and SL Salzberg. Removing Contaminants from Metagenomic Databases.  
672 Biorxiv. *bioRxiv* 261859; doi: <https://doi.org/10.1101/261859>  
673
- 674 46. A. Borst, A. Box and A. Fluit: False-positive results and contamination in nucleic  
675 acid amplification assays: suggestions for a prevent and destroy strategy. *European*  
676 *Journal of Clinical Microbiology and Infectious Diseases* 2004;**23**(4): 289-299.  
677
- 678 47. Xu Z, Zhang F, Xu B, Tan J, Li S, Jin L. Improving the sensitivity of negative  
679 controls in ancient DNA extractions. *Electrophoresis*. 2009;**30**:1282–5.  
680  
681

682 **Data Accessibility**

683 QIIME demultiplexed sequences (16SContam\_seqs\_forpub.fna), a phylogenetic tree  
684 of representative sequences (rep\_set.tre), a biom table (otu\_table\_clean.biom), and  
685 sample metadata (SampleInformation\_20180820.txt) can be accessed from  
686 <https://figshare.com/account/articles/7283816> (doi: 10.25909/5bdaa4431a941).

687 **Author Contributions**

688 LSW and AGF conceived of the study. LSW, AGF, RE, JY, CS, MHD, and CA

689 contributed samples and completed lab work. LSW, LA, and JB completed

690 bioinformatic analysis of the data. LSW wrote the paper, and all authors edited and

691 contributed to the final manuscript.

## 692 **Figure and Table Legends**

### 693 **Figure 1: Lower diversity is observed in EBC and NTC samples.**

694 The number of sequenced reads from samples that were all pooled at equimolar  
695 concentrations is displayed on a box and whisker plot. (B) The alpha diversity of each  
696 type sample (*i.e.* the within sample diversity) was calculated using observed species  
697 metric in QIIME for rarefied 16S rRNA data. Each sample was rarefied up to 10,000  
698 sequences in 500 sequence intervals; the standard error at each subsampling event is  
699 displayed. Calculus samples are shown in blue, while control samples (extraction  
700 blank controls (EBCs) and no-template controls (NTCs)) from the ancient laboratory  
701 (AL) and the modern laboratory (ML) in red and green, respectively.

702

### 703 **Figure 2: Microbial phyla within controls are distinct from biological samples.**

704 The proportion of different microbial phyla are shown for a wide-array of modern and  
705 ancient calculus samples and controls samples (EBCs and NTCs) from both  
706 laboratory facilities (modern lab (ML) and ancient lab (AL)) and two different  
707 extraction methods: the method employed in ancient DNA research and a  
708 commercially available DNA extraction kit (kit). Rare phyla were collapsed if the  
709 represented less than 0.001% of the total phyla observed.

710

### 711 **Figure 3: PCoA plots of control samples highlight differences in method and** 712 **laboratory.**

713 PCoA plots of unweighted UniFrac values were plotted in QIIME to compare beta  
714 diversity differences (between samples differences) in all samples (A) or in different  
715 laboratories (B). The different laboratory facilities are represented by ML (modern  
716 lab) and AL (ancient lab), and the two control types are represented by EBC  
717 (extraction blank control) or no-template control (NTC).

718

### 719 **Figure 4: PCoA analysis of extraction method and seasonal variation on** 720 **contaminant communities**

721 The modern and ancient calculus samples were removed from the analysis presenting  
722 in Figure 3, and a PCoA plot was constructed of only control samples to identify  
723 differences between the extraction method and laboratory in control samples (A). (B)  
724 UniFrac values from controls samples (EBCs and NTCs) from the ancient laboratory  
725 over a five-year period (2012 – 2016) are colored on a PCoA plot according to month.



726

727 **Table 1: Dominant contaminant genera are largely unique within each**  
728 **laboratory.**

729 The 69 genera that dominated EBC control samples are displayed for all sample types  
730 and include the proportion identified in each sample type. Genera were identified if  
731 dominant if they were found to be above 0.01% of the total genera identified within  
732 each laboratory. Taxa highlighted in green represent genera that dominated EBCs in  
733 the ancient laboratory, while unhighlighted are those from the modern EBC samples.  
734 If the genera were identified in previous studies that examined contamination, the  
735 reference number is shown in the right hand column.

736

737 **Table 2: Extraction methods contain unique taxa.**

738 OTUs identified as statistically significant (Kruskal-Wallis Bonferroni Corrected p-  
739 value <0.05) between the two extraction methods in the modern laboratory are listed.  
740 OTUs highlighted in green were significantly within the QG method, while  
741 highlighted OTUs were significant in the kit extraction method.

**Figure 1**

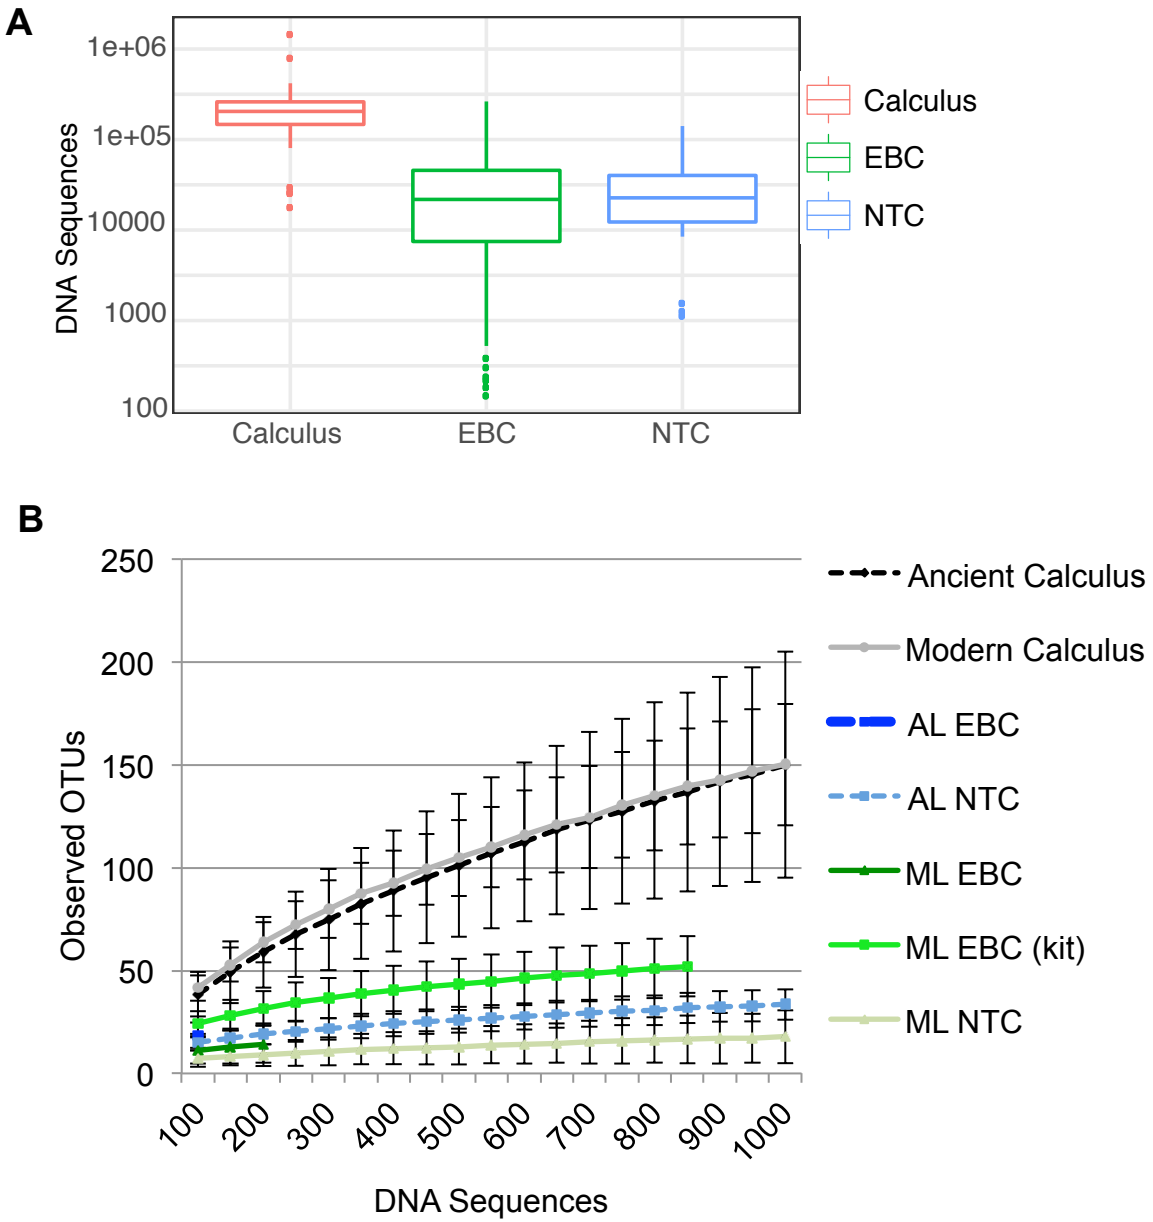

**Figure 2**

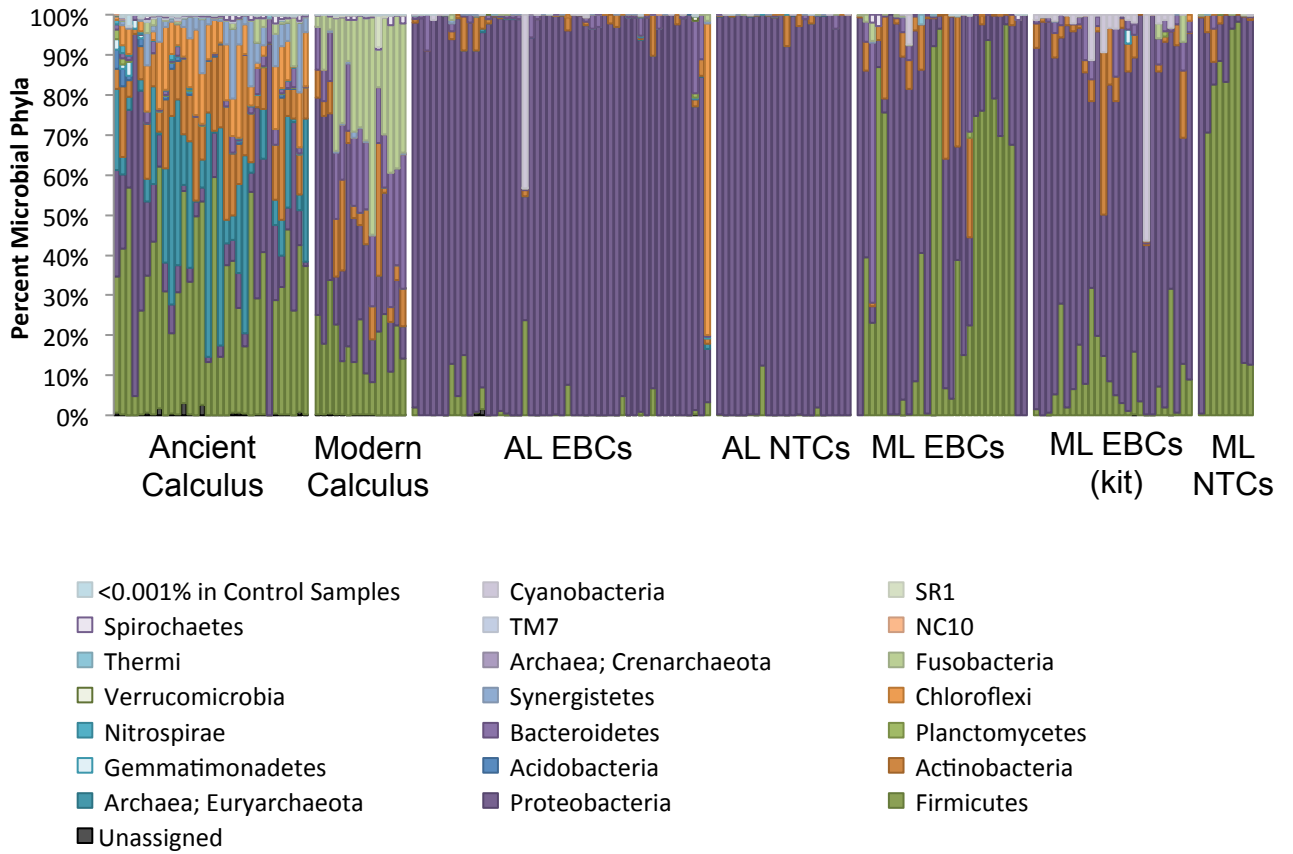

**Figure 3**

**A**

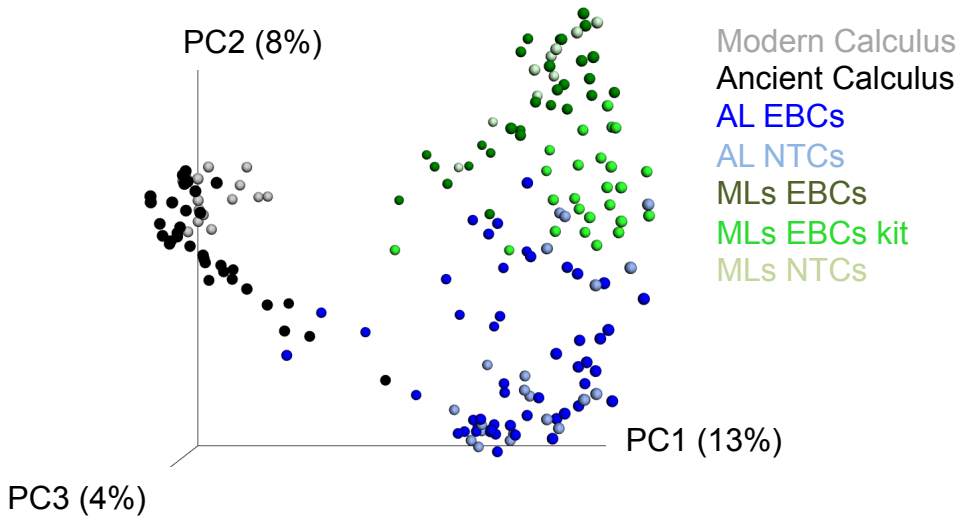

**B**

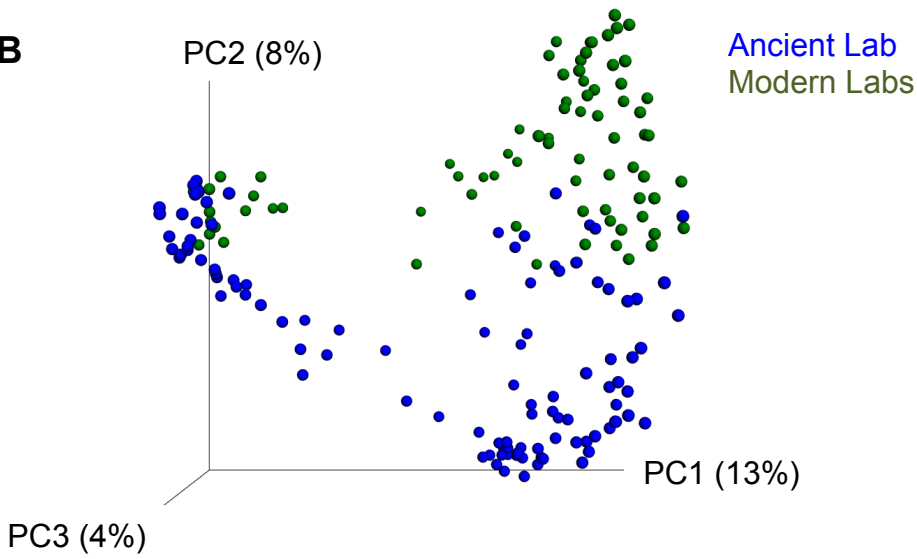

**Figure 4**

**A**

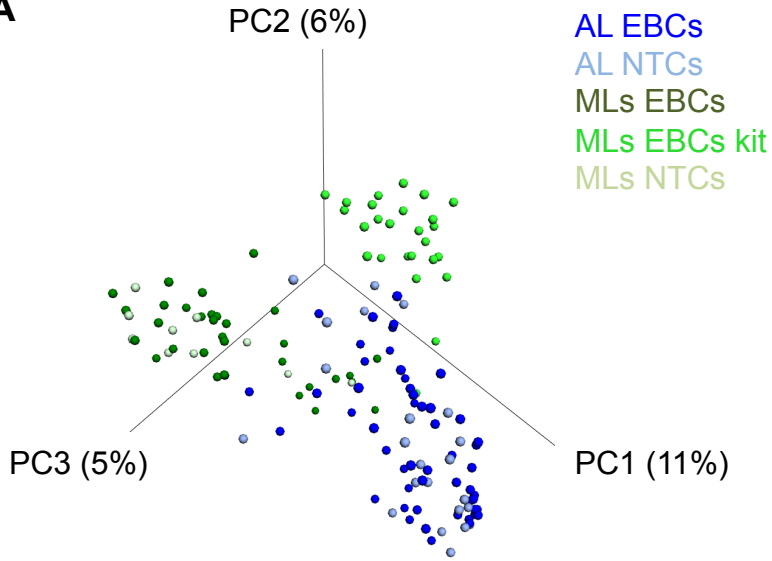

**B**

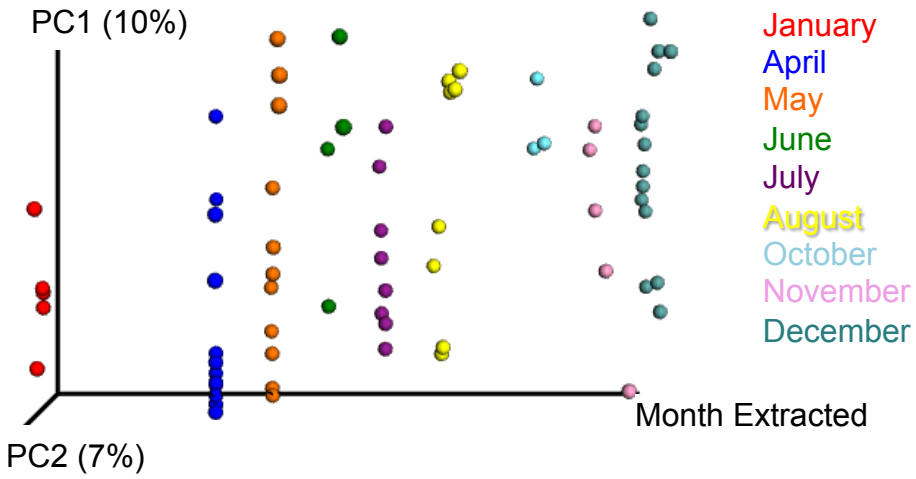

**Table 1**

| Genera Taxonomy                                                                                          | AL EBC   | ML EBC   | ML EBC (kit) | AL NTC   | ML NTC   | Identified Previously (Ref) |
|----------------------------------------------------------------------------------------------------------|----------|----------|--------------|----------|----------|-----------------------------|
| Bacteria;p_Actinobacteria;c_Actinobacteria;o_Actinomycetales;f_Actinomycetales;g_Actinomycetes           | 0.000243 | 0.001159 | 0.002897     | 9.89E-05 | 1.33E-05 |                             |
| Bacteria;p_Actinobacteria;c_Actinobacteria;o_Actinomycetales;f_Actinomycetales;g_N09                     | 0        | 0.012119 | 0            | 0        | 0        |                             |
| Bacteria;p_Actinobacteria;c_Actinobacteria;o_Actinomycetales;f_Corynebacteriales;g_Corynebacterium       | 0.000294 | 0.025472 | 0.010478     | 0.001034 | 0.00033  | 3                           |
| Bacteria;p_Actinobacteria;c_Actinobacteria;o_Actinomycetales;f_Dermacoccaceae;g_Dermacoccus              | 0        | 0.005987 | 0            | 0        | 0.00399  |                             |
| Bacteria;p_Actinobacteria;c_Actinobacteria;o_Actinomycetales;f_Micrococcales;g__                         | 0.000644 | 0.017225 | 0.000293     | 5.38E-05 | 0        |                             |
| Bacteria;p_Actinobacteria;c_Actinobacteria;o_Actinomycetales;f_Micrococcales;g__                         | 6.30E-05 | 0.001636 | 0.002447     | 2.50E-06 | 0.00011  |                             |
| Bacteria;p_Actinobacteria;c_Actinobacteria;o_Actinomycetales;f_Micrococcales;g_Micrococcus               | 0.000229 | 0.002165 | 0.002806     | 2.50E-06 | 4.00E-05 | 3                           |
| Bacteria;p_Bacteroidetes;c_[Saprosiriales];o_[Saprosiriales];f_Chitinophagaceae;g_Sediminibacterium      | 0.001729 | 0        | 2.17E-06     | 0        | 0        |                             |
| Bacteria;p_Bacteroidetes;c_Cytophagia;o_Cytophagales;f_Cytophagaceae;g__                                 | 0.00173  | 0        | 0.000884     | 1.25E-06 | 0        |                             |
| Bacteria;p_Bacteroidetes;c_Flavobacteria;o_Flavobacteriales;f_[Weeksellaceae];g__                        | 6.68E-06 | 0.001492 | 0            | 5.01E-06 | 6.67E-06 |                             |
| Bacteria;p_Bacteroidetes;c_Flavobacteria;o_Flavobacteriales;f_[Weeksellaceae];g_Chryseobacterium         | 0.000571 | 0.004948 | 0.000128     | 0        | 0        | 3                           |
| Bacteria;p_Bacteroidetes;c_Flavobacteria;o_Flavobacteriales;f_[Weeksellaceae];g_Cloacibacterium          | 0.010137 | 0.039939 | 0.006025     | 0.000769 | 0.00207  |                             |
| Bacteria;p_Bacteroidetes;c_Flavobacteria;o_Flavobacteriales;f_[Weeksellaceae];g_Wautersiella             | 0.002471 | 8.33E-05 | 0.000113     | 0.001456 | 0        |                             |
| Bacteria;p_Bacteroidetes;c_Flavobacteria;o_Flavobacteriales;f_Cryomorphaeae;g_Fluviicola                 | 0.001045 | 0        | 0            | 0        | 0        |                             |
| Bacteria;p_Bacteroidetes;c_Flavobacteria;o_Flavobacteriales;f_Flavobacteriaceae;g_Flavobacterium         | 0.002652 | 0.004036 | 0.000325     | 0        | 2.00E-05 | 3, 4                        |
| Bacteria;p_Bacteroidetes;c_Sphingobacteria;o_Sphingobacteriales;f_g__                                    | 0.001722 | 0        | 6.28E-05     | 0        | 0        |                             |
| Bacteria;p_Bacteroidetes;c_Sphingobacteria;o_Sphingobacteriales;f_Sphingobacteriaceae;g__                | 0        | 0.002581 | 0            | 0        | 0        |                             |
| Bacteria;p_Bacteroidetes;c_Sphingobacteria;o_Sphingobacteriales;f_Sphingobacteriaceae;g_Pedobacter       | 0.001991 | 2.08E-06 | 0            | 0        | 6.67E-06 | 3                           |
| Bacteria;p_Cyanobacteria;c_Chloroplast;o_Streptophyta;f_g__                                              | 0.009702 | 0.000779 | 0.051116     | 2.50E-06 | 6.67E-06 |                             |
| Bacteria;p_Firmicutes;c_Bacilli;o_Bacillales;f_[Thermicaceae];g_Thermicanus                              | 0        | 0.002846 | 0            | 0        | 0        |                             |
| Bacteria;p_Firmicutes;c_Bacilli;o_Bacillales;f_Bacillaceae;g_Bacillus                                    | 0.000154 | 0.009569 | 0.001742     | 2.75E-05 | 6.67E-06 | 3                           |
| Bacteria;p_Firmicutes;c_Bacilli;o_Bacillales;f_Bacillaceae;g_Geobacillus                                 | 0        | 0.002712 | 0.000165     | 0        | 0        |                             |
| Bacteria;p_Firmicutes;c_Bacilli;o_Bacillales;f_Paenibacillaceae;g_Paenibacillus                          | 0.001262 | 0.465748 | 0.000121     | 2.13E-05 | 0.82364  | 3                           |
| Bacteria;p_Firmicutes;c_Bacilli;o_Bacillales;f_Staphylococcaceae;g_Staphylococcus                        | 0.000884 | 0.022356 | 0.002642     | 0.001866 | 0.00876  |                             |
| Bacteria;p_Firmicutes;c_Bacilli;o_Lactobacillales;f_Aerococcaceae;g__                                    | 0.000368 | 0.006397 | 0.001008     | 1.25E-06 | 0        |                             |
| Bacteria;p_Firmicutes;c_Bacilli;o_Lactobacillales;f_Enterococcaceae;g_Enterococcus                       | 0        | 0.024966 | 2.82E-05     | 0        | 8.01E-05 |                             |
| Bacteria;p_Firmicutes;c_Bacilli;o_Lactobacillales;f_Leuconostocaceae;g_Leuconostoc                       | 0.001056 | 0.000633 | 0            | 0        | 0        |                             |
| Bacteria;p_Firmicutes;c_Bacilli;o_Lactobacillales;f_Streptococcaceae;g_Lactococcus                       | 0.003898 | 0        | 0.003962     | 0        | 0        |                             |
| Bacteria;p_Firmicutes;c_Bacilli;o_Lactobacillales;f_Streptococcaceae;g_Streptococcus                     | 0.000944 | 0.004338 | 0.022634     | 4.01E-05 | 0.00388  | 3                           |
| Bacteria;p_Firmicutes;c_Clostridia;o_Clostridiales;f_Clostridiaceae;g_Clostridium                        | 0.000102 | 0.001049 | 0.002926     | 0.000879 | 0.00102  |                             |
| Bacteria;p_Plantnomyces;c_Plantnomycetia;o_Pirellulales;f_Pirellulaceae;g__                              | 0.000177 | 0.002577 | 0            | 0        | 6.67E-06 |                             |
| Bacteria;p_Proteobacteria;c_Alphaproteobacteria;o_Rhizobiales;f_g__                                      | 0.00118  | 0.000518 | 0.000938     | 0.001164 | 6.67E-06 |                             |
| Bacteria;p_Proteobacteria;c_Alphaproteobacteria;o_Rhizobiales;f_Bradyrhizobiales;g__                     | 0.001811 | 4.16E-06 | 0.016817     | 0.001168 | 0        |                             |
| Bacteria;p_Proteobacteria;c_Alphaproteobacteria;o_Rhizobiales;f_Bradyrhizobiales;g_Bradyrhizobium        | 0.006719 | 0.0004   | 0.003966     | 0.013655 | 0.00169  | 3, 4                        |
| Bacteria;p_Proteobacteria;c_Alphaproteobacteria;o_Rhizobiales;f_Hyphomicrobiales;g_Devosia               | 0.001031 | 0        | 0.006283     | 0        | 0        | 3                           |
| Bacteria;p_Proteobacteria;c_Alphaproteobacteria;o_Rhizobiales;f_Methylobacteriaceae;g_Methylobacterium   | 0.021743 | 0.000162 | 0.001198     | 0.04655  | 0        | 3, 28                       |
| Bacteria;p_Proteobacteria;c_Alphaproteobacteria;o_Rhizobiales;f_Phyllobacteriaceae;g_Mesorhizobium       | 0.005669 | 0.000552 | 0.000598     | 0        | 0        | 3                           |
| Bacteria;p_Proteobacteria;c_Alphaproteobacteria;o_Rhodospirillales;f_Acetobacteraceae;g__                | 4.17E-07 | 0.001397 | 0.001554     | 0        | 0.00702  |                             |
| Bacteria;p_Proteobacteria;c_Alphaproteobacteria;o_Rickettsiales;f_mitochondria;Other                     | 0.001506 | 0        | 0.001207     | 0.000476 | 0        |                             |
| Bacteria;p_Proteobacteria;c_Alphaproteobacteria;o_Sphingomonadales;f_Erythrobacteraceae;g__              | 0.000717 | 0.085193 | 0.009221     | 0        | 0.0591   |                             |
| Bacteria;p_Proteobacteria;c_Alphaproteobacteria;o_Sphingomonadales;f_Erythrobacteraceae;Other            | 0        | 0.001492 | 8.67E-06     | 0        | 4.00E-05 |                             |
| Bacteria;p_Proteobacteria;c_Alphaproteobacteria;o_Sphingomonadales;f_Sphingomonadaceae;g__               | 0.001988 | 0.000327 | 0.001296     | 9.51E-05 | 6.67E-06 |                             |
| Bacteria;p_Proteobacteria;c_Alphaproteobacteria;o_Sphingomonadales;f_Sphingomonadaceae;g_Novosphingobium | 0.015942 | 0.002879 | 0.006879     | 0.044996 | 0.00165  | 3                           |
| Bacteria;p_Proteobacteria;c_Alphaproteobacteria;o_Sphingomonadales;f_Sphingomonadaceae;g_Sphingobium     | 0.002402 | 0        | 0.009915     | 1.88E-05 | 0        | 3                           |
| Bacteria;p_Proteobacteria;c_Alphaproteobacteria;o_Sphingomonadales;f_Sphingomonadaceae;g_Sphingomonas    | 0.007868 | 0.004113 | 0.00788      | 0.017517 | 0.00798  | 3, 28, 4                    |
| Bacteria;p_Proteobacteria;c_Betaproteobacteria;o_f_g__                                                   | 0.000291 | 0.001116 | 0            | 1.25E-06 | 0        |                             |
| Bacteria;p_Proteobacteria;c_Betaproteobacteria;o_Burkholderiales;f_Alcaligenaceae;g_Achromobacter        | 0.001025 | 2.08E-06 | 0            | 5.13E-05 | 0        |                             |
| Bacteria;p_Proteobacteria;c_Betaproteobacteria;o_Burkholderiales;f_Burkholderiaceae;g_Burkholderia       | 0.029885 | 0        | 0.000282     | 0.00102  | 0        | 3, 4                        |
| Bacteria;p_Proteobacteria;c_Betaproteobacteria;o_Burkholderiales;f_Comamonadaceae;g__                    | 0.02727  | 0.061636 | 0.014919     | 0.004361 | 0.01679  |                             |
| Bacteria;p_Proteobacteria;c_Betaproteobacteria;o_Burkholderiales;f_Comamonadaceae;g_Comamonas            | 0.16639  | 0.000181 | 0.055275     | 0.131521 | 0.0001   | 3, 28                       |
| Bacteria;p_Proteobacteria;c_Betaproteobacteria;o_Burkholderiales;f_Comamonadaceae;g_Limnochthobium       | 0.007023 | 0.001341 | 0.002967     | 0.010622 | 0        |                             |
| Bacteria;p_Proteobacteria;c_Betaproteobacteria;o_Burkholderiales;f_Comamonadaceae;g_Tepidimonas          | 0.032485 | 0.003524 | 0.000483     | 0.002675 | 0        |                             |
| Bacteria;p_Proteobacteria;c_Betaproteobacteria;o_Burkholderiales;f_Comamonadaceae;Other                  | 0.054856 | 0.004001 | 0.025356     | 0.072105 | 0.00195  |                             |
| Bacteria;p_Proteobacteria;c_Betaproteobacteria;o_Burkholderiales;f_Oxalobacteraceae;g_Cupriavidus        | 0.002021 | 0.001418 | 0.000542     | 0.00034  | 0        | 3, 28                       |
| Bacteria;p_Proteobacteria;c_Betaproteobacteria;o_Burkholderiales;f_Oxalobacteraceae;g_Ralstonia          | 0.010983 | 0.013709 | 0.015801     | 0.045934 | 0.00927  | 3, 28, 4, 29                |
| Bacteria;p_Proteobacteria;c_Betaproteobacteria;o_Burkholderiales;f_Oxalobacteraceae;Other                | 0.002536 | 0.00011  | 0.001636     | 0.018057 | 0        |                             |
| Bacteria;p_Proteobacteria;c_Betaproteobacteria;o_Methylphilales;f_Methylphilaceae;g__                    | 0.002073 | 0        | 0            | 0        | 0        |                             |
| Bacteria;p_Proteobacteria;c_Betaproteobacteria;o_Rhodocyclales;f_Rhodocyclaceae;g__                      | 0.00023  | 0.001971 | 0.002921     | 0.001048 | 0        |                             |
| Bacteria;p_Proteobacteria;c_Gammaproteobacteria;o_Aeromonadales;f_Aeromonadaceae;g__                     | 7.81E-05 | 0.001607 | 0.00405      | 1.25E-06 | 0        |                             |
| Bacteria;p_Proteobacteria;c_Gammaproteobacteria;o_Enterobacteriales;f_Enterobacteriaceae;g__             | 0.01923  | 0.082828 | 0.039958     | 0.036438 | 0.00017  |                             |
| Bacteria;p_Proteobacteria;c_Gammaproteobacteria;o_Enterobacteriales;f_Enterobacteriaceae;Other           | 0.014787 | 1.25E-05 | 0.005398     | 0.030091 | 0.00438  |                             |
| Bacteria;p_Proteobacteria;c_Gammaproteobacteria;o_Pseudomonadales;f_Moraxellaceae;g_Acinetobacter        | 0.393093 | 0.001653 | 0.264511     | 0.411117 | 0.00023  | 3, 2, 28                    |
| Bacteria;p_Proteobacteria;c_Gammaproteobacteria;o_Pseudomonadales;f_Moraxellaceae;g_Enhydrobacter        | 0.001156 | 0.018176 | 0.000503     | 0.002678 | 0.01944  | 3                           |
| Bacteria;p_Proteobacteria;c_Gammaproteobacteria;o_Pseudomonadales;f_Pseudomonadaceae;g__                 | 0.00019  | 0.005277 | 0.006005     | 7.51E-05 | 6.67E-05 |                             |
| Bacteria;p_Proteobacteria;c_Gammaproteobacteria;o_Pseudomonadales;f_Pseudomonadaceae;g_Pseudomonas       | 0.08139  | 0.004871 | 0.02539      | 0.082003 | 0.00877  | 3, 29, 4                    |
| Bacteria;p_Proteobacteria;c_Gammaproteobacteria;o_Pseudomonadales;f_Pseudomonadaceae;Other               | 0.005272 | 0.014047 | 0.000178     | 5.01E-06 | 0.00171  |                             |
| Bacteria;p_Proteobacteria;c_Gammaproteobacteria;o_Xanthomonadales;f_Xanthomonadaceae;g__                 | 0.005478 | 0.000377 | 0.001892     | 0.001645 | 0        |                             |
| Bacteria;p_Proteobacteria;c_Gammaproteobacteria;o_Xanthomonadales;f_Xanthomonadaceae;g_Lysobacter        | 0.001864 | 2.08E-06 | 0            | 0        | 0        |                             |
| Bacteria;p_Proteobacteria;c_Gammaproteobacteria;o_Xanthomonadales;f_Xanthomonadaceae;g_Stenotrophomonas  | 0.001809 | 0.001405 | 0.000761     | 0.000969 | 0.00039  | 3, 2, 28, 29, 4             |

**Table 2**

| OTU Taxonomy                                                                                                         | Mean Seqs/Sample |          |
|----------------------------------------------------------------------------------------------------------------------|------------------|----------|
|                                                                                                                      | Kit              | QG       |
| Bacteria;p_Firmicutes;c_Bacilli;o_Bacillales                                                                         | 6.535714         | 0.008696 |
| Bacteria;p_Firmicutes;c_Bacilli;o_Bacillales;f_Alicyclobacillaceae;g_Alicyclobacillus;s_                             | 2.821429         | 0        |
| Bacteria;p_Firmicutes;c_Bacilli;o_Bacillales;f_Alicyclobacillaceae;g_Alicyclobacillus;s_                             | 7.214286         | 0        |
| Bacteria;p_Firmicutes;c_Bacilli;o_Bacillales;f_Alicyclobacillaceae;g_Alicyclobacillus;s_                             | 1.928571         | 0        |
| Bacteria;p_Firmicutes;c_Bacilli;o_Bacillales;f_Alicyclobacillaceae;g_Alicyclobacillus;s_                             | 2.071429         | 0        |
| Bacteria;p_Firmicutes;c_Bacilli;o_Bacillales;f_Alicyclobacillaceae;g_Alicyclobacillus;s_                             | 1.714286         | 0        |
| Bacteria;p_Proteobacteria;c_Gammaproteobacteria;o_Oceanospirillales;f_Halomonadaceae;g_Halomonas;s_                  | 0.035714         | 0        |
| Bacteria;p_Actinobacteria;c_Actinobacteria;o_Actinomycetales;f_Pseudonocardiaceae;g_Pseudonocardia;s_                | 0.035714         | 0        |
| Bacteria;p_Proteobacteria;c_Gammaproteobacteria;o_Pseudomonadales;f_Moraxellaceae;g_Acinetobacter;s_                 | 385.2857         | 0.026087 |
| Bacteria;p_Proteobacteria;c_Alphaproteobacteria;o_Rhizobiales;f_Bradyrhizobiaceae;g_s_                               | 93.42857         | 0        |
| Bacteria;p_Proteobacteria;c_Alphaproteobacteria;o_Rhizobiales;f_Bradyrhizobiaceae;g_s_                               | 91.85714         | 11.72174 |
| Bacteria;p_Firmicutes;c_Bacilli;o_Bacillales;f_Alicyclobacillaceae;g_Alicyclobacillus;s_                             | 0.857143         | 0        |
| Bacteria;p_Firmicutes;c_Bacilli;o_Bacillales;f_Alicyclobacillaceae;g_Alicyclobacillus;s_                             | 0.857143         | 0        |
| Bacteria;p_Proteobacteria;c_Betaproteobacteria;o_Neisseriales;f_Neisseriaceae;g_Vogesella;s_                         | 184.4643         | 0        |
| Bacteria;p_Proteobacteria;c_Alphaproteobacteria;o_Rhizobiales;f_Bradyrhizobiaceae                                    | 2.357143         | 0.008696 |
| Bacteria;p_Proteobacteria;c_Gammaproteobacteria;o_Pseudomonadales;f_Moraxellaceae;g_Acinetobacter;s_                 | 395.3929         | 0.626087 |
| Bacteria;p_Proteobacteria;c_Alphaproteobacteria;o_Sphingomonadales;f_Sphingomonadaceae;g_Sphingobium;s_              | 160.75           | 33.24348 |
| Bacteria;p_Firmicutes;c_Erysipelotrichi;o_Erysipelotrichales;f_Erysipelotrichaceae;g_Allobaculum;s_                  | 0.607143         | 0        |
| Bacteria;p_Firmicutes;c_Bacilli;o_Bacillales;f_Alicyclobacillaceae;g_Alicyclobacillus;s_                             | 0.428571         | 0        |
| Bacteria;p_Verrucomicrobia;c_Verrucomicrobiae;o_Verrucomicrobiales;f_Verrucomicrobiaceae;g_Akkermansia;s_muciniphila |                  | 0.5      |
| Bacteria;p_Proteobacteria;c_Gammaproteobacteria;o_Pseudomonadales;f_Moraxellaceae;g_Acinetobacter;s_                 | 82.14286         | 0.73913  |
| Bacteria;p_Proteobacteria;c_Alphaproteobacteria;o_Rhizobiales;f_Bradyrhizobiaceae                                    | 1.964286         | 1.721739 |
| Bacteria;p_Firmicutes;c_Erysipelotrichi;o_Erysipelotrichales;f_Erysipelotrichaceae;g_Allobaculum;s_                  | 0.464286         | 0        |
| Bacteria;p_Firmicutes;c_Bacilli;o_Bacillales;f_Alicyclobacillaceae;g_Alicyclobacillus;s_                             | 0.392857         | 0        |
| Bacteria;p_Cyanobacteria;c_Chloroplast;o_Streptophyta;f_g_s_                                                         |                  | 2        |
| Bacteria;p_Cyanobacteria;c_Chloroplast;o_Streptophyta;f_g_s_                                                         | 26.10714         | 1.547826 |
| Bacteria;p_Firmicutes;c_Bacilli;o_Lactobacillales                                                                    | 1.964286         | 1.991304 |
| Bacteria;p_Proteobacteria;c_Gammaproteobacteria;o_Enterobacteriales;f_Enterobacteriaceae;g_s_                        | 5.392857         | 23.46087 |
| Bacteria;p_Proteobacteria;c_Gammaproteobacteria;o_Pseudomonadales;f_Pseudomonadaceae;g_Pseudomonas;s_                | 0                | 0.008696 |
| Bacteria;p_Proteobacteria;c_Betaproteobacteria;o_Burkholderiales;f_Comamonadaceae;g_s_                               | 0                | 0.008696 |
| Bacteria;p_Proteobacteria;c_Gammaproteobacteria;o_Pseudomonadales;f_Pseudomonadaceae;g_Pseudomonas;s_                | 0                | 0.008696 |
| Bacteria;p_Proteobacteria;c_Betaproteobacteria;o_Burkholderiales;f_Comamonadaceae;g_s_                               | 0                | 0.008696 |
| Bacteria;p_Proteobacteria;c_Gammaproteobacteria;o_Enterobacteriales;f_Enterobacteriaceae;g_s_                        | 5.571429         | 44.6     |
| Bacteria;p_Proteobacteria;c_Gammaproteobacteria;o_Oceanospirillales;f_Alcanivoracaceae;g_Alcanivorax;s_              | 0                | 0.017391 |
| Bacteria;p_Proteobacteria;c_Gammaproteobacteria;o_Enterobacteriales;f_Enterobacteriaceae;g_s_                        | 4.785714         | 20.73043 |
| Bacteria;p_Proteobacteria;c_Gammaproteobacteria;o_Enterobacteriales;f_Enterobacteriaceae;g_s_                        | 4.928571         | 23.37391 |
| Bacteria;p_Proteobacteria;c_Epsilonproteobacteria;o_Campylobacteriales;f_Helicobacteraceae;g_s_                      | 0                | 0.017391 |
| Bacteria;p_Proteobacteria;c_Gammaproteobacteria;o_Enterobacteriales;f_Enterobacteriaceae;g_s_                        | 0                | 0.017391 |
| Bacteria;p_Proteobacteria;c_Gammaproteobacteria;o_Oceanospirillales;f_Halomonadaceae;g_Halomonas;s_                  | 0                | 0.026087 |
| Bacteria;p_Proteobacteria;c_Gammaproteobacteria;o_Enterobacteriales;f_Enterobacteriaceae;g_s_                        | 1.892857         | 4.33913  |
| Bacteria;p_Proteobacteria;c_Betaproteobacteria;o_Burkholderiales;f_Oxalobacteraceae;g_Cupriavidus;s_                 | 0                | 0.034783 |
| Bacteria;p_Proteobacteria;c_Gammaproteobacteria;o_Enterobacteriales;f_Enterobacteriaceae;g_s_                        | 1.107143         | 5.921739 |
| Bacteria;p_Proteobacteria;c_Alphaproteobacteria;o_Rhodobacterales;f_Rhodobacteraceae;g_s_                            | 0                | 0.026087 |
| Bacteria;p_Proteobacteria;c_Gammaproteobacteria;o_Alteromonadales;f_Alteromonadaceae;g_Marinobacter;s_               | 0                | 0.034783 |
